# Supplementary material for: Lieb–Oxford bound and pair correlation functions for density-functional methods based on the adiabatic-connection fluctuation-dissipation theorem
Source: Royal Society of Chemistry journal article supplement (doi:10.1039/d0fd00047g), 2020-01-01
Supplement: d0fd00047g1.pdf [file d0fd00047g1.pdf]

# Basis sets and technical details of the calculations of correlation pair densities

## Supporting Information

Jannis Erhard,<sup>1</sup> Steffen Fauser,<sup>1</sup> Simon Kalaß,<sup>1</sup> Evgeny  
Moerman,<sup>1</sup> Egor Trushin,<sup>1</sup> and Andreas Görling<sup>1,\*</sup>

<sup>1</sup>*Lehrstuhl für Theoretische Chemie, Universität Erlangen-Nürnberg,  
Egerlandstr. 3, D-91058 Erlangen, Germany*

(Dated: July 29, 2020)

In all calculations of correlation pair densities the frequency integration required in the evaluation of correlation energies and potentials was performed numerically with a Gauss-Legendre quadrature with 20 points. Tests with higher numbers of quadrature points showed that 20 points are sufficient. The OEP equations were solved without using a Tichonov regularization.

### A. Helium atom

For the helium atom the AO basis set (atomic orbital basis set to represent the Kohn-Sham orbitals) and the RI basis set (resolution of the identity basis set to represent dynamic response functions) were Gaussian basis sets containing s-functions with exponents forming a geometric series with progression factors of 1.5<sup>1</sup>. For the higher angular momenta the aug-cc-pV6Z<sup>2</sup> basis set was used as AO basis set and the aug-cc-pV5Z-MP2FIT<sup>3,4</sup> basis set as RI basis set. The OEP basis (optimized effective potential basis set to represent the Kohn-Sham exchange-correlation potential) was an aug-cc-pVTZ-MP2FIT<sup>3,4</sup> basis set. If the reference electron is not located at the nucleus a chargeless dummy atom carrying AO, RI, and OEP basis sets was placed at the position of the reference electron. The AO basis on the dummy atom is equal to that on the He atom, whereas the RI basis contains only the s-functions listed below. The OEP basis on the dummy atom contains only one s-function given below.

List of s-functions of the basis sets for the case the reference electron is located at the nucleus:

AO Basis:

0.01988

0.02982

0.04473

0.067095

0.100642

0.150964

0.226446

0.339668

0.509503  
0.764254  
1.14638  
1.71957  
2.57936  
3.86904  
5.80355  
8.70533  
13.058  
19.587  
29.3805  
44.0707  
66.1061  
99.1592  
148.739  
223.108  
334.662  
501.993  
752.99  
1129.48  
1694.23  
2541.34  
3812.01  
5718.02  
8577.02  
12865.5  
19298.3  
28947.4  
43421.2  
65131.7  
97697.6  
146546

219820

329729

494594

RI Basis:

0.0804293

0.120644

0.180966

0.271449

0.407173

0.61076

0.91614

1.37421

2.06131

3.09197

4.63796

6.95694

10.4354

15.6531

23.4797

35.2195

52.8292

79.2439

118.866

178.299

267.448

401.172

601.758

902.637

1353.96

2030.94

3046.41

4569.61  
6854.42  
10281.6  
15422.4  
23133.6  
34700.4  
52050.6  
78075.9  
117114

List of s-functions of the basis sets for the case the reference electron is not located at the nucleus (dummy atom at the position of the reference electron):

A0 Basis on the He atom and on the dummy atom:

0.01988  
0.02982  
0.04473  
0.067095  
0.100642  
0.150964  
0.226446  
0.339668  
0.509503  
0.764254  
1.14638  
1.71957  
2.57936  
3.86904  
5.80355  
8.70533  
13.058  
19.587  
29.3805

44.0707  
66.1061  
99.1592  
148.739  
223.108  
334.662  
501.993  
752.99  
1129.48  
1694.23  
2541.34  
3812.01  
5718.02  
8577.02

RI Basis on the He atom and on the dummy atom (The function in square brackets were only used on the helium atom but not on the dummy atom.):

[0.0804293]  
[0.120644]  
[0.180966]  
0.271449  
0.407173  
0.61076  
0.91614  
1.37421  
2.06132  
3.09197  
4.63796  
6.95694  
10.4354  
15.6531

23.4797  
35.2195  
52.8293  
79.2439  
118.866  
178.299  
267.448  
401.172  
601.758  
902.637  
[1353.96]  
[2030.93]  
[3046.4]

OEP Basis on the dummy atom (only one function)

1.185426

## B. Hydrogen molecule

For the hydrogen molecule the AO and OEP basis sets (both for H atoms and the dummy atom) were slightly modified versions of basis sets originally designed to calculate reference correlation potentials from electron densities from configuration interaction calculations<sup>5</sup>. For the s-functions of the RI basis Gaussian basis functions with exponents forming a geometrical series with progression factor 1.5 were used<sup>1</sup>. For the higher angular momenta the aug-cc-pV5Z-MP2FIT<sup>3,4</sup> basis set was used on the H atoms. On the dummy atom no basis functions with higher angular momentum were used.

These basis sets were used for all distances and positions of the reference atom.

List of basis functions:

AO Basis on the H atoms:

s,0.0084

s,0.0126

s,0.0189  
s,0.02835  
s,0.042525  
s,0.0637875  
s,0.0956812  
s,0.143522  
s,0.215283  
s,0.322924  
s,0.484386  
s,0.726579  
s,1.08987  
s,1.6348  
s,2.45221  
s,3.67831  
s,5.51746  
s,8.27619  
s,12.4143  
s,18.6214  
s,27.9322  
s,41.8982  
s,62.8474  
s,94.271  
s,141.407  
s,212.11  
s,318.165  
s,477.247  
s,715.871  
s,1073.81  
s,1610.71  
s,2416.06  
s,3624.1  
p,5.97458



p,2.05217  
p,1.24866  
p,0.805545  
p,0.347892  
p,0.196067  
d,3.85816  
d,1.71063  
d,0.979237  
d,0.625366  
d,0.233601  
f,3.10151  
f,1.19811  
f,0.572873  
f,0.236155  
g,2.9878  
g,1.23192  
g,0.79632  
h,3.24739  
h,1.03498

AO Basis on the dummy atom:

s,2.80963  
s,4.21445  
s,6.32168  
s,9.48251  
s,14.2238  
s,21.3357  
s,32.0035  
s,48.0052  
s,72.0078  
s,108.012  
s,1.873089

s,0.526184  
p,2.372549  
p,1.180408  
d,1.809637  
d,1.143973

s-functions of the RI Basis on the H atoms:

0.0492938  
0.0739407  
0.110911  
0.166367  
0.24955  
0.374325  
0.561487  
0.84223  
1.26335  
1.89502  
2.84253  
4.26379  
6.39569  
9.59353  
14.3903  
21.5854  
32.3782  
48.5672  
72.8509  
109.276  
163.914  
245.871

s-functions of the RI Basis on the dummy atom

(The two functions in square brackets were used only  
in the calculations at equilibrium distance.):

0.84223

1.26335

1.89502

2.84253

4.26379

6.39569

9.59353

14.3903

21.5854

32.3782

[ 48.5672 ]

[ 72.8509 ]

OEP Basis on the H atoms:

s,5.11589

s,1.142965

s,0.291662

s,0.11272

p,0.986401

p,0.28586

d,1.172083

OEP Basis on the dummy atom:

s,1.142965

s,0.2916662

s,0.112720

---

\* andreas.goerling@fau.de

<sup>1</sup> S. Fauser, *Master thesis*, Friedrich-Alexander-Universität Erlangen-Nürnberg (2019).

<sup>2</sup> F. Weigend, A. Köhn, and C. Hättig, *J. Chem. Phys.* **116**, 3175 (2002).

<sup>3</sup> D. E. Woon and J. T. H. Dunning, *J. Chem. Phys.* **103**, 4572 (1995).

<sup>4</sup> K. A. Peterson and T. H. Dunning Jr, *J. Chem. Phys.* **117**, 10548 (2002).

<sup>5</sup> C. Ritterhoff, *Bachelor thesis*, Friedrich-Alexander-Universität Erlangen-Nürnberg (2018).
